# Supplementary material for: Connecting post-release mortality to the physiological stress response of large coastal sharks in a commercial longline fishery
Source: PubMed Central journal article supplement (PMC8443047; doi:10.1371/journal.pone.0255673), 2021-09-15
Supplement: pone.0255673.s001.pdf [file pone.0255673.s001.pdf]

**S1 Table. Description of how condition index scores were assigned for released sharks.**

| Condition Index Score | Behavioral characterization                                                           |
|-----------------------|---------------------------------------------------------------------------------------|
| 1: Good               | Strong tailbeats, fast swimming and equilibrium upheld immediately upon release       |
| 2: Fair               | Slow but consistent swimming immediately upon release, equilibrium upheld             |
| 3: Poor               | Erratic or atypical swimming upon release, equilibrium mostly upheld                  |
| 4: Very poor          | Alive upon release, but weak or no swimming observed, inability to uphold equilibrium |
| 5: Dead               | Dead prior to release                                                                 |

Guidelines were first set by Hueter et al., (2006).
