# Supplementary material for: Connecting post-release mortality to the physiological stress response of large coastal sharks in a commercial longline fishery
Source: PubMed Central journal article supplement (PMC8443047; doi:10.1371/journal.pone.0255673), 2021-09-15
Supplement: pone.0255673.s002.pdf [file pone.0255673.s002.pdf]

**S2 Table. All at-vessel metrics that were used in analyses.**

| <b>Category</b>                                  | <b>Metric</b>                                                                                        |
|--------------------------------------------------|------------------------------------------------------------------------------------------------------|
| Behavioural metrics                              | Release condition<br>Nictitating membrane reflex<br>Bite reflex<br>Flex reflex<br>Equilibrium reflex |
| Environmental metrics                            | Water temperature<br>Dissolved oxygen level                                                          |
| Morphological metrics/<br>at-vessel measurements | Time on line<br>Total length<br>Girth<br>Sex                                                         |
| Blood metrics                                    |                                                                                                      |
| <i>Blood composition</i>                         | pH<br>Hematocrit                                                                                     |
| <i>Metabolites</i>                               | Lactate<br>Glucose                                                                                   |
| <i>Electrolytes</i>                              | K <sup>+</sup><br>Na <sup>+</sup><br>Mg <sup>2+</sup><br>Ca <sup>2+</sup><br>Cl <sup>-</sup>         |

Metrics are divided by categories, which are also referred to in the text.
