# Supplementary material for: Connecting post-release mortality to the physiological stress response of large coastal sharks in a commercial longline fishery
Source: PubMed Central journal article supplement (PMC8443047; doi:10.1371/journal.pone.0255673), 2021-09-15
Supplement: pone.0255673.s003.pdf [file pone.0255673.s003.pdf]

**S3 Table. At-vessel measurements from each species of shark sampled depending on at vessel condition or post-release fate.**

| Species   | Category        | <i>N</i> | TOL        | TL       | Release condition      | NM reflex                | Bite reflex | Flex reflex | Equilibrium reflex       | Water temp. (°C) | Dissolved oxygen |
|-----------|-----------------|----------|------------|----------|------------------------|--------------------------|-------------|-------------|--------------------------|------------------|------------------|
| Sandbar   | AVM             | 1        | 723        | 190      | NA                     | NA                       | NA          | NA          | NA                       | 19.8             | 7.3              |
|           | Alive at vessel | 184      | 241 ± 225  | 194 ± 17 | 2.3 ± 0.7              | 0.88 ± 0.33              | 0.79 ± 0.41 | 0.88 ± 0.33 | 0.99 ± 0.09              | 21.9 ± 2.5       | 7.3 ± 0.7        |
|           | PRM             | 4        | 568 ± 380  | 206 ± 9  | 3.3 <sup>†</sup> ± 0.5 | 0.33 <sup>†</sup> ± 0.58 | 1 ± 0       | 0.67 ± 0.58 | 1 ± 0                    | 21.7 ± 1.6       | 7.2 ± 0.3        |
| Blacktip  | Survived        | 126      | 270 ± 225  | 201 ± 11 | 2.2 ± 0.7              | 0.89 ± 0.32              | 0.77 ± 0.42 | 0.88 ± 0.33 | 0.99 ± 0.10              | 21.5 ± 2.6       | 7.3 ± 0.8        |
|           | AVM             | 108      | 234* ± 225 | 141 ± 20 | NA                     | NA                       | NA          | NA          | NA                       | 27.3 ± 3.8       | 6.5 ± 0.7        |
|           | Alive at vessel | 184      | 115 ± 135  | 148 ± 19 | 2.3 ± 0.9              | 0.20 ± 0.40              | 0.36 ± 0.48 | 0.62 ± 0.49 | 0.89 ± 0.32              | 26.9 ± 3.1       | 6.5 ± 0.6        |
|           | PRM             | 44       | 117 ± 138  | 152 ± 15 | 2.7 <sup>†</sup> ± 0.9 | 0.14 ± 0.35              | 0.36 ± 0.48 | 0.64 ± 0.48 | 0.79 <sup>†</sup> ± 0.42 | 28.9 ± 2.8       | 6.1 ± 0.6        |
| Tiger     | Survived        | 61       | 135 ± 179  | 158 ± 15 | 2.0 ± 0.8              | 0.24 ± 0.43              | 0.36 ± 0.48 | 0.62 ± 0.50 | 0.98 ± 0.13              | 27.5 ± 3.3       | 6.4 ± 0.8        |
|           | Alive at vessel | 126      | 233 ± 249  | 202 ± 59 | 2.4 ± 0.8              | 0.93 ± 0.25              | 0.96 ± 0.21 | 0.81 ± 0.39 | 1 ± 0                    | 23.4 ± 4.5       | 7.1 ± 0.94       |
|           | PRM             | 1        | 234        | 199      | 1                      | 1                        | 0           | 1           | 1                        | 18.8             | 8.1              |
| Spinner   | Survived        | 51       | 312 ± 280  | 197 ± 34 | 2.3 ± 0.8              | 0.96 ± 0.21              | 0.63 ± 0.49 | 0.78 ± 0.42 | 1 ± 0                    | 22.4 ± 5.2       | 7.3 ± 1.1        |
|           | AVM             | 34       | 701* ± 174 | 175 ± 33 | NA                     | NA                       | NA          | NA          | NA                       | 18.8 ± 3.4       | 8.1 ± 0.85       |
|           | Alive at vessel | 21       | 385 ± 254  | 185 ± 20 | 3.0 ± 0.9              | 0.40 ± 0.51              | 0.93 ± 0.26 | 0.87 ± 0.35 | 0.73 ± 0.46              | 19.7 ± 3.3       | 7.5 ± 1.1        |
|           | PRM             | 10       | 422 ± 248  | 192 ± 11 | 3.6 <sup>†</sup> ± 0.7 | 0.33 ± 0.50              | 1 ± 0       | 0.89 ± 0.33 | 0.56 ± 0.53              | 19.7 ± 4.2       | 7.6 ± 1.3        |
| Bull      | Survived        | 4        | 423 ± 313  | 174 ± 25 | 2.3 ± 0.5              | 0.50 ± 0.71              | 0.5 ± 0.71  | 1 ± 0       | 1 ± 0                    | 19.0 ± 2.1       | 7.6 ± 1.3        |
|           | Alive at vessel | 36       | 167 ± 226  | 202 ± 45 | 2.4 ± 0.9              | 0.25 ± 0.46              | 0.63 ± 0.52 | 1 ± 0       | 1 ± 0                    | 25.3 ± 3.1       | 6.8 ± 0.7        |
|           | PRM             | 1        | 103        | 265      | 3                      | 1                        | 0           | 1           | 1                        | 31.0             | 5.1              |
| Blacknose | Survived        | 13       | 257 ± 315  | 218 ± 24 | 2.4 ± 0.9              | 0.14 ± 0.38              | 0.71 ± 0.49 | 1 ± 0       | 1 ± 0                    | 26.6 ± 3.9       | 6.5 ± 0.7        |
|           | AVM             | 56       | 212* ± 194 | 104 ± 13 | NA                     | NA                       | NA          | NA          | NA                       | 26.0 ± 4.3       | 6.8 ± 0.8        |
|           | Alive at vessel | 178      | 109 ± 91   | 104 ± 13 | 2.4 ± 1.0              | 0.89 ± 0.32              | 0.63 ± 0.50 | 1 ± 0       | 0.95 ± 0.23              | 25.8 ± 2.4       | 6.7 ± 0.4        |
|           | PRM             | 1        | 157        | 111      | 3                      | 1                        | 1           | 1           | 1                        | 23.6             | 7.2              |

PRM = Post-release mortality; AVM= at-vessel mortality. Values are presented as mean ± SD. Reflexes (nictitating membrane (NM), flex, bite, and equilibrium) were scored as a ‘1’ if unimpaired and a ‘0’ if impaired or absent, and release condition was scored as 1 to 4 based on swimming ability, with 1 indicating strong ability and 4 poor ability. The numbers of animals in each category (*N*) are included, but note that this sample size is not necessarily the same for all parameters reported, as certain parameters were not necessarily available for all individuals, particularly for AVM and Alive at vessel individuals that were not tracked post-release. An ‘\*’ after the AVM value and blue shading indicates a significant difference (logistic regression  $p < 0.01$ ) of metric values between AVM and Alive at vessel individuals, and a ‘†’ after the PRM value and purple shading indicates a significant difference (logistic regression  $p < 0.01$ ) of metric values between PRM and individuals that survived capture.
