# Supplementary material for: Connecting post-release mortality to the physiological stress response of large coastal sharks in a commercial longline fishery
Source: PubMed Central journal article supplement (PMC8443047; doi:10.1371/journal.pone.0255673), 2021-09-15
Supplement: pone.0255673.s004.pdf [file pone.0255673.s004.pdf]

**S4 Table. Blood parameters from each species of shark sampled depending on at vessel condition and post-release outcome.**

| Species   | Category        | <i>N</i> | pH                     | Hematocrit (%) | Lactate (mmol L <sup>-1</sup> ) | Glucose (mmol L <sup>-1</sup> ) | K <sup>+</sup> (mmol L <sup>-1</sup> ) | Na <sup>+</sup> (mmol L <sup>-1</sup> ) | Cl <sup>-</sup> (mmol L <sup>-1</sup> ) | Mg <sup>2+</sup> (mmol L <sup>-1</sup> ) | Ca <sup>2+</sup> (mmol L <sup>-1</sup> ) |
|-----------|-----------------|----------|------------------------|----------------|---------------------------------|---------------------------------|----------------------------------------|-----------------------------------------|-----------------------------------------|------------------------------------------|------------------------------------------|
| Sandbar   | AVM             | 1        | 7.1                    | NA             | 38.1*                           | 120.0                           | 9.6*                                   | 291.9                                   | 262.8*                                  | 1.4*                                     | 2.6                                      |
|           | Alive at vessel | 184      | 7.4 ± 0.1              | 25.7 ± 2.9     | 9.2 ± 7.9                       | 30.5 ± 43.3                     | 5.3 ± 0.6                              | 283 ± 9                                 | 284 ± 7                                 | 1.0 ± 0.1                                | 2.6 ± 0.1                                |
|           | PRM             | 4        | 7.1 <sup>†</sup> ± 0.2 | 27.6 ± 2.8     | 26.6 <sup>†</sup> ± 5.8         | 64.5 ± 75.7                     | 6.7 <sup>†</sup> ± 1.3                 | 287 ± 4                                 | 274 <sup>†</sup> ± 11                   | 1.1 <sup>†</sup> ± 0.2                   | 2.7 ± 0.1                                |
| Blacktip  | Survived        | 126      | 7.4 ± 0.1              | 25.6 ± 2.8     | 8.7 ± 7.4                       | 29.3 ± 41.9                     | 5.3 ± 0.5                              | 283 ± 9                                 | 284 ± 7                                 | 1.0 ± 0.1                                | 2.6 ± 0.1                                |
|           | AVM             | 108      | 6.6* ± 0.1             | 23.9 ± 8.2     | 35.7* ± 9.4                     | 79.3 ± 34.6                     | 10.9* ± 3.4                            | 293 ± 11                                | 276* ± 35                               | 1.4* ± 0.4                               | 3.2* ± 0.2                               |
|           | Alive at vessel | 184      | 7.2 ± 0.2              | 26.3 ± 4.1     | 23.4 ± 13.8                     | 90.5 ± 46.2                     | 6.4 ± 1.2                              | 297 ± 15                                | 288 ± 11                                | 1.2 ± 0.3                                | 3.0 ± 0.2                                |
| Tiger     | PRM             | 44       | 7.1 <sup>†</sup> ± 0.2 | 25.9 ± 4.4     | 29.8 <sup>†</sup> ± 13.3        | 99.4 ± 42.9                     | 6.9 <sup>†</sup> ± 1.4                 | 299 ± 15                                | 285 ± 12                                | 1.3 <sup>†</sup> ± 0.2                   | 3.0 ± 0.2                                |
|           | Survived        | 61       | 7.3 ± 0.2              | 26.7 ± 4.2     | 17.4 ± 11.7                     | 86.1 ± 47.4                     | 5.9 ± 0.7                              | 295 ± 15                                | 290 ± 8                                 | 1.2 ± 0.2                                | 3.0 ± 0.1                                |
|           | Alive at vessel | 126      | 7.5 ± 0.2              | 25.9 ± 4.8     | 4.7 ± 5.2                       | 108.7 ± 53.1                    | 5.3 ± 0.6                              | 278 ± 10                                | 283 ± 8                                 | 1.0 ± 0.2                                | 2.8 ± 0.1                                |
| Spinner   | PRM             | 1        | 7.6                    | 28.2           | 1.5                             | 123                             | 5.0                                    | 258.9                                   | 264.3                                   | 0.9                                      | 2.6                                      |
|           | Survived        | 51       | 7.5 ± 0.1              | 26.6 ± 4.7     | 4.4 ± 5.1                       | 115.5 ± 43.6                    | 5.2 ± 0.6                              | 276 ± 9                                 | 281 ± 8                                 | 1.0 ± 0.1                                | 2.7 ± 0.1                                |
|           | AVM             | 34       | 6.8* ± 0.2             | 32.6 ± 11.3    | 40.6* ± 12.5                    | 90.4 ± 48.1                     | 12.5* ± 4.2                            | 283* ± 9                                | 267* ± 10                               | 1.4* ± 0.2                               | 2.9 ± 0.2                                |
| Bull      | Alive at vessel | 21       | 7.3 ± 0.2              | 32.2 ± 3.4     | 23.6 ± 13.8                     | 80.0 ± 67.7                     | 6.4 ± 1.3                              | 299 ± 13                                | 284 ± 12                                | 1.2 ± 0.1                                | 2.9 ± 0.2                                |
|           | PRM             | 10       | 7.3 ± 0.2              | 32.6 ± 3.9     | 30.6 ± 13.8                     | 93.5 ± 71.9                     | 6.9 ± 1.5                              | 301 ± 16                                | 282 ± 16                                | 1.2 ± 0.1                                | 2.9 ± 0.2                                |
|           | Survived        | 4        | 7.4 ± 0.1              | 30.6 ± 3.3     | 13.5 ± 9.8                      | 99.2 ± 65.0                     | 6.2 ± 0.9                              | 296 ± 12                                | 286 ± 7                                 | 1.2 ± 0.2                                | 2.8 ± 0.1                                |
| Blacknose | Alive at vessel | 36       | 7.2 <sup>†</sup> ± 0.2 | 24.3 ± 3.5     | 9.6 ± 6.8                       | 79.1 ± 37.7                     | 6.0 ± 0.6                              | 295 ± 10                                | 296 ± 8                                 | 1.2 ± 0.2                                | 3.0 ± 0.2                                |
|           | PRM             | 1        | 6.7                    | 18.9           | 20.4                            | 102                             | 7.2                                    | 286.8                                   | 291.9                                   | 1.4                                      | 3.2                                      |
|           | Survived        | 13       | 7.3 ± 0.2              | 24.8 ± 3.2     | 8.8 ± 6.3                       | 77.3 ± 38.7                     | 5.9 ± 0.5                              | 296 ± 10                                | 297 ± 8                                 | 1.2 ± 0.2                                | 2.9 ± 0.2                                |
| Blacknose | AVM             | 56       | 6.6* ± 0.1             | 23.0 ± 8.1     | 34.4* ± 14.2                    | 107.4 ± 23.6                    | 12.4* ± 5.5                            | 292 ± 8                                 | 276* ± 12                               | 1.5 ± 0.2                                | 3.0* ± 0.1                               |
|           | Alive at vessel | 178      | 7.2 ± 0.2              | 26.7 ± 4.7     | 18.5 ± 12.8                     | 107.5 ± 51.3                    | 6.2 ± 0.9                              | 296 ± 9                                 | 287 ± 8                                 | 1.3 ± 0.3                                | 2.9 ± 0.2                                |
|           | PRM             | 1        | 6.9                    | 30.7           | 17.4                            | 78                              | 5.9                                    | 305                                     | 287                                     | 1.2                                      | 2.8                                      |

PRM = Post-release mortality; AVM= at-vessel mortality. Values are presented as mean ± SD. The numbers of animals in each category (*N*) are included, but note that this sample size is not necessarily the same for all parameters reported, as certain parameters were not necessarily available for all individuals, particularly for AVM and Alive at vessel individuals that were not tracked post-release. Blood pH values are temperature corrected according to methods reported in the text. An ‘\*’ after the AVM value and blue shading indicates a significant difference (logistic regression  $p < 0.01$ ) of metric values between AVM and Alive at vessel individuals, and a ‘<sup>†</sup>’ after the PRM value and purple shading indicates a significant difference (logistic regression  $p < 0.01$ ) of metric values between PRM and individuals that survived capture.
